# Supplementary material
Source: PubMed Central journal article supplement (PMC6378986)
Supplement: supp_RA118.005069_139684_2_supp_250539_pj1fw0.pdf [file supp_RA118.005069_139684_2_supp_250539_pj1fw0.pdf]

Cholesterol increases the E3 ligase MARCH6, controlling protein demolition

**Laura J. Sharpe<sup>1,†</sup>, Vicky Howe<sup>1,†</sup>, Nicola A. Scott<sup>1</sup>, Winnie Luu<sup>1</sup>, Lisa Phan<sup>1</sup>, Jason M. Berk<sup>2</sup>,  
Mark Hochstrasser<sup>2</sup>, and Andrew J. Brown<sup>1,\*</sup>**

**Contents:**

**Figure S1: Endogenous MARCH6 is stabilized by cholesterol**

**Figure S2: Genomic characterisation of CRISPR cell-lines**

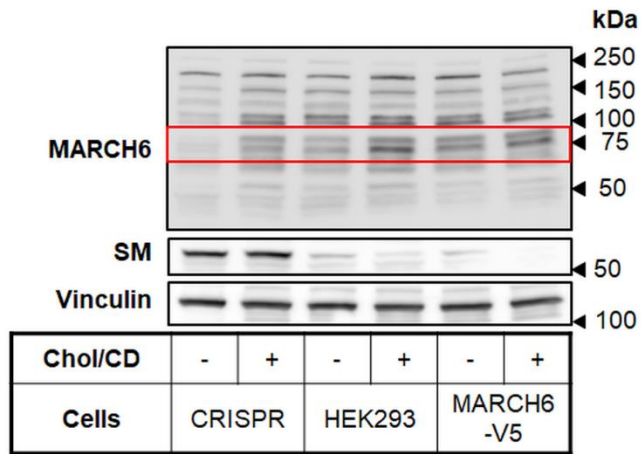

**Figure S1: Endogenous MARCH6 is stabilized by cholesterol**

HEK293-CRISPR, HEK293, or HEK293-MARCH6-V5 cells were treated for 4 h with or without 20  $\mu\text{g/ml}$  Chol/CD before harvesting. Protein levels of endogenous MARCH6, endogenous SM and vinculin were analyzed by Western blotting. The red box indicated the MARCH6 band.

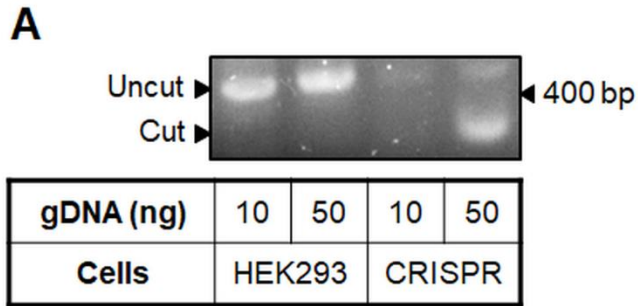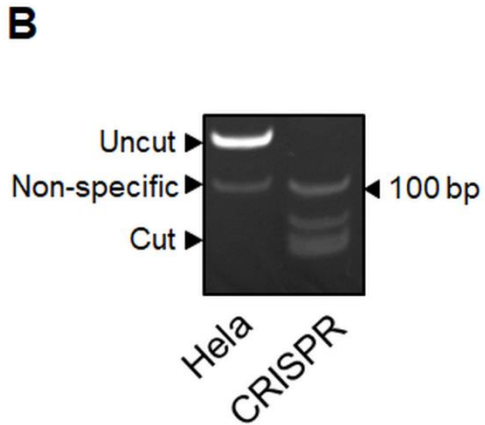

**Figure S2: Genomic characterisation of CRISPR cell-lines**

Genomic DNA from (A) HEK293 or HEK293-CRISPR cell-lines and (B) HeLa or HeLa-CRISPR cell-lines was subjected to PCR to confirm deletion of the targeted region. PCR products were separated by (A) agarose gel or (B) 6% acrylamide TBE gel electrophoresis and visualized with EtBr staining.
